# Supplementary material for: A carnosine intervention study in overweight human volunteers: bioavailability and reactive carbonyl species sequestering effect
Source: PubMed Central journal article supplement (PMC4893669; doi:10.1038/srep27224), 2016-06-06
Supplement: srep27224-s1.pdf [file srep27224-s1.pdf]

## **A carnosine intervention study in overweight human volunteers: bioavailability and reactive carbonyl species sequestering effect**

Luca Regazzoni<sup>a\*</sup>, Barbora de Courten<sup>b\*</sup>, Davide Garzon<sup>a</sup>, Alessandra Altomare<sup>a</sup>, Cristina Marinello<sup>a</sup>, Michaela Jakubova<sup>d</sup>, Silvia Vallova<sup>d</sup>, Patrik Krumpolec<sup>c</sup>, Marina Carini<sup>a</sup>, Jozef Ukropec<sup>c</sup>, Barbara Ukropcova<sup>c,d^^</sup> and Giancarlo Aldini<sup>a^</sup>

<sup>a</sup> Department of Pharmaceutical Sciences, Università degli Studi di Milano, Milan, Italy

<sup>b</sup> Monash Centre for Health, Research and Implementation, School of Public health and Preventive Medicine, Melbourne, Australia

<sup>c</sup> Institute of Experimental Endocrinology, Biomedical Research Center, Slovak Academy of Sciences, Bratislava, Slovakia

<sup>d</sup> Faculty of Medicine, Comenius University, Bratislava, Slovakia

**Supplementary material**

| <i>Adduct type</i>            | <b>HNE</b>                             | <b>ACR</b> |
|-------------------------------|----------------------------------------|------------|
|                               | Adduct concentration ( $\mu\text{M}$ ) |            |
| <i>Michael adduct</i>         | 497                                    | 230        |
| <i>Schiff base (aldimine)</i> | 453                                    | 295        |
| <i>FDP-CAR</i>                | -                                      | 415        |
| <i>MP-CAR</i>                 | -                                      | 10         |

Table S1- Concentration of the carnosine adducts.

***analytical method for urine***

| <i>Concentration (<math>\mu\text{M}</math>)</i> | <i>Intraday (CV %)</i> | <i>Interday (CV%)</i> | <i>Accuracy</i> |
|-------------------------------------------------|------------------------|-----------------------|-----------------|
| <i>1</i>                                        | 8.6                    | 10.1                  | $\pm 9.3\%$     |
| <i>25</i>                                       | 5.3                    | 11.3                  | $\pm 5.1\%$     |
| <i>200</i>                                      | 6.1                    | 6.8                   | $\pm 4.7\%$     |

***analytical method for plasma***

| <i>Concentration (<math>\mu\text{M}</math>)</i> | <i>Intraday (CV %)</i> | <i>Interday (CV%)</i> | <i>Accuracy</i> |
|-------------------------------------------------|------------------------|-----------------------|-----------------|
| <i>0.5</i>                                      | 9.7                    | 12.3                  | $\pm 8.8\%$     |
| <i>10</i>                                       | 6.6                    | 10.5                  | $\pm 6.3\%$     |
| <i>100</i>                                      | 4.9                    | 5.8                   | $\pm 4.1\%$     |

Table S2- Intra and inter-day precision and accuracy data for carnosine in urine and plasma

| <i>Subject #</i> | <i>group</i> | <b>U-CRE</b> | <b>U-PRO</b> | <b>U-AGE</b> | <b>U-PAL</b> | <b>U-POL</b> | <b>U-CAR</b> |
|------------------|--------------|--------------|--------------|--------------|--------------|--------------|--------------|
|                  |              | mg/mL        |              | UF/mL        |              | nmoles/mL    |              |
| # 1              | control      | 0.03         | 1.21         | 948.02       | 0.60         | 0.98         | 0.09         |
| # 2              | control      | 0.08         | 8.19         | 2141.46      | 0.89         | 0.87         | 13.70        |
| # 3              | control      | 0.07         | 3.93         | 5210.06      | 0.79         | 0.59         | 1.38         |
| # 4              | control      | 0.08         | 12.99        | 1078.70      | 0.35         | 0.63         | 4.95         |
| # 5              | control      | 0.09         | 2.61         | 1009.23      | 0.85         | 0.99         | 8.84         |
| # 6              | control      | 0.11         | 4.88         | 2487.92      | 0.53         | 0.78         | 15.32        |
| # 7              | control      | 0.15         | 5.69         | 1312.12      | 0.60         | 0.98         | 3.65         |
| # 8              | control      | 0.13         | 9.18         | 2412.23      | 2.11         | 3.01         | 12.08        |
| # 9              | control      | 0.14         | 7.37         | 2655.77      | 1.69         | 1.69         | 21.15        |
| # 12             | control      | 0.13         | 8.26         | 1982.79      | 2.76         | 1.41         | 17.58        |
| # 13             | control      | 0.09         | 6.34         | 1874.86      | 2.35         | 2.69         | 19.20        |
| # 14             | control      | 0.20         | 8.38         | 1995.39      | 1.56         | 1.70         | 5.27         |
| # 15             | control      | 0.02         | 0.63         | 245.49       | 0.38         | 0.60         | 0.50         |
| # 16             | control      | 0.16         | 17.41        | 2856.87      | 1.03         | 1.52         | 14.34        |
| # 17             | control      | 0.06         | 3.85         | 2695.11      | 0.66         | 0.92         | 10.46        |
| # 18             | control      | 0.13         | 6.84         | 1579.98      | 1.06         | 0.96         | 4.62         |
| # 19             | control      | 0.11         | 13.28        | 1947.14      | 0.88         | 1.08         | 5.92         |
| # 20             | control      | 0.19         | 7.99         | 3260.62      | 1.77         | 2.26         | 6.57         |
| # 21             | control      | 0.19         | 6.93         | 4144.75      | 1.33         | 1.51         | 20.82        |
| # 22             | control      | 0.07         | 6.90         | 1178.90      | 1.04         | 1.18         | 2.68         |
| # 23             | control      | 0.10         | 1.60         | 965.19       | 1.16         | 1.14         | 3.33         |
| # 24             | control      | 0.07         | 2.11         | 1161.95      | 0.79         | 0.99         | 9.48         |
| # 25             | control      | 0.10         | 18.57        | 2147.52      | 0.67         | 1.02         | 7.22         |
| # 26             | control      | 0.25         | 13.18        | 2218.11      | 2.41         | 2.81         | 15.96        |
| # 27             | control      | 0.03         | 1.90         | 452.89       | 0.35         | 0.66         | 1.06         |
| # 28             | control      | 0.09         | 14.29        | 1463.01      | 1.47         | 1.66         | 7.86         |
| # 29             | control      | 0.06         | 4.74         | 534.19       | 0.45         | 0.75         | 1.38         |
| # 30             | control      | 0.18         | 7.56         | 1750.71      | 0.82         | 1.00         | 11.10        |
| # 31             | control      | 0.17         | 11.51        | 2560.08      | 2.92         | 2.39         | 15.32        |
| # 1              | carnosine    | 0.05         | 3.12         | 928.93       | 0.89         | 0.84         | 1.38         |
| # 2              | placebo      | 0.13         | 7.68         | 1637.53      | 1.16         | 1.02         | 14.34        |
| # 3              | placebo      | 0.10         | 5.45         | 3766.44      | 0.52         | 0.67         | 3.65         |
| # 4              | carnosine    | 0.05         | 3.37         | 1957.97      | 1.14         | 0.77         | 11.10        |
| # 5              | carnosine    | 0.05         | 2.46         | 641.13       | 0.64         | 0.78         | 7.54         |
| # 6              | carnosine    | 0.06         | 4.07         | 1216.31      | 0.66         | 0.66         | 45.77        |
| # 7              | carnosine    | 0.14         | 9.24         | 2030.79      | 0.89         | 0.84         | 13.05        |
| # 8              | placebo      | 0.18         | 7.97         | 3529.45      | 2.55         | 2.80         | 12.40        |
| # 9              | carnosine    | 0.17         | 7.97         | 2518.33      | 1.86         | 1.04         | 306.58       |
| # 12             | carnosine    | 0.15         | 11.33        | 2288.04      | 2.43         | 1.68         | 25.68        |
| # 13             | carnosine    | 0.10         | 11.17        | 2726.18      | 5.49         | 4.05         | 350.00       |

|      |           |      |       |          |      |      |        |
|------|-----------|------|-------|----------|------|------|--------|
| # 14 | carnosine | 0.22 | 9.50  | 2159.23  | 3.39 | 1.75 | 33.13  |
| # 15 | placebo   | 0.05 | 7.16  | 1290.25  | 0.65 | 0.77 | 3.98   |
| # 16 | carnosine | 0.16 | 17.14 | 4285.56  | 1.80 | 1.40 | 31.51  |
| # 17 | placebo   | 0.08 | 4.96  | 5368.77  | 0.83 | 0.89 | 7.54   |
| # 18 | placebo   | 0.11 | 13.72 | 2536.25  | 1.16 | 1.04 | 5.60   |
| # 19 | placebo   | 0.09 | 13.51 | 1738.42  | 1.06 | 1.23 | 4.62   |
| # 20 | placebo   | 0.07 | 0.71  | 749.10   | 1.20 | 1.06 | 1.38   |
| # 21 | placebo   | 0.10 | 2.58  | 1718.45  | 1.00 | 1.00 | 6.89   |
| # 22 | placebo   | 0.04 | 4.56  | 745.40   | 0.67 | 0.84 | 1.38   |
| # 23 | carnosine | 0.11 | 2.62  | 1471.80  | 1.65 | 1.44 | 8.19   |
| # 24 | carnosine | 0.15 | 13.78 | 6339.33  | 3.74 | 2.47 | 52.90  |
| # 25 | placebo   | 0.18 | 24.53 | 13604.31 | 0.56 | 1.13 | 6.89   |
| # 26 | carnosine | 0.23 | 19.52 | 3079.14  | 4.81 | 3.47 | 19.53  |
| # 27 | placebo   | 0.09 | 10.13 | 2284.25  | 3.01 | 1.25 | 9.16   |
| # 28 | carnosine | 0.05 | 8.87  | 3370.30  | 1.61 | 1.25 | 146.86 |
| # 29 | carnosine | 0.15 | 14.93 | 2602.29  | 1.88 | 1.56 | 12.72  |
| # 30 | placebo   | 0.07 | 8.92  | 1557.86  | 0.57 | 0.80 | 5.27   |
| # 31 | placebo   | 0.12 | 4.87  | 1495.10  | 1.53 | 1.36 | 9.48   |

Table S3 – Urinary mean concentration (n=2) for creatinine (U-CRE), total protein (U-PRO), carboxymethyl lysine (P-CML), advanced glycoxidation end-products (U-AGE), carnosine-propanal (U-PAL), carnosine-propanol (U-POL) and carnosine (U-CAR).

**Subject # group      HSA   HSA   HSA      P-PRO   P-CML   P-AGE   P-AOPP   P-PCO**  
**-SH   -Cys   -Glc**

|      |           | % HSA |       |       | mg/mL | ng/mL   | UF/mL   | nmoles/mL |        |
|------|-----------|-------|-------|-------|-------|---------|---------|-----------|--------|
| # 1  | control   | 58.89 | 22.60 | 18.51 | 64.48 | 3228.51 | 664.14  | 344.97    | 98.01  |
| # 2  | control   | 59.93 | 22.65 | 17.43 | 66.70 | 3266.97 | 657.66  | 125.40    | 107.39 |
| # 3  | control   | 55.39 | 26.97 | 17.64 | 69.13 | 3578.86 | 799.83  | 193.56    | 154.16 |
| # 4  | control   | 56.81 | 24.34 | 18.85 | 61.36 | 2571.60 | 518.49  | 317.23    | 154.63 |
| # 5  | control   | 60.95 | 21.14 | 17.92 | 63.47 | 3174.77 | 572.50  | 171.37    | 147.89 |
| # 6  | control   | 58.37 | 22.49 | 19.15 | 69.17 | 3141.01 | 649.51  | 174.31    | 152.87 |
| # 7  | control   | 53.93 | 28.20 | 17.87 | 59.90 | 3348.41 | 618.17  | 296.51    | 155.74 |
| # 8  | control   | 59.39 | 23.12 | 17.50 | 70.18 | 3381.27 | 610.57  | 239.31    | 147.38 |
| # 9  | control   | 62.43 | 21.30 | 16.27 | 58.49 | 6774.31 | 483.13  | 288.94    | 129.85 |
| # 12 | control   | 60.43 | 22.47 | 17.10 | 71.13 | 3785.54 | 939.63  | 389.08    | 165.02 |
| # 13 | control   | 62.24 | 20.95 | 16.83 | 62.62 | 4973.91 | 541.66  | 211.03    | 56.98  |
| # 14 | control   | 58.92 | 23.46 | 17.62 | 63.60 | 3193.36 | 1071.02 | 323.09    | 79.50  |
| # 15 | control   | 60.99 | 22.30 | 16.72 | 68.02 | 2955.47 | 570.01  | 245.55    | 57.82  |
| # 16 | control   | 59.23 | 23.41 | 17.36 | 46.98 | 2117.39 | 483.42  | 192.15    | 71.88  |
| # 17 | control   | 59.13 | 22.52 | 18.36 | 61.06 | 2604.21 | 720.51  | 263.17    | 82.43  |
| # 18 | control   | 59.40 | 22.04 | 18.55 | 64.72 | 2749.31 | 639.43  | 403.85    | 58.25  |
| # 19 | control   | 56.21 | 24.94 | 18.86 | 63.48 | 3308.58 | 724.94  | 390.40    | 67.29  |
| # 20 | control   | 58.07 | 23.25 | 18.69 | 62.47 | 2856.75 | 761.51  | 384.19    | 62.47  |
| # 21 | control   | 56.58 | 25.98 | 17.44 | 73.23 | 3220.66 | 653.94  | 309.03    | 71.03  |
| # 22 | control   | 61.04 | 22.23 | 16.74 | 22.67 | 2785.46 | 601.89  | 564.94    | 83.20  |
| # 23 | control   | 58.40 | 23.94 | 17.67 | 63.91 | 2732.79 | 470.38  | 369.40    | 84.36  |
| # 24 | control   | 59.12 | 24.09 | 16.81 | 58.22 | 2410.89 | 669.53  | 588.02    | 105.96 |
| # 25 | control   | 57.26 | 25.43 | 17.32 | 62.80 | 3175.80 | 454.04  | 472.26    | 105.50 |
| # 26 | control   | 62.02 | 21.34 | 16.65 | 66.90 | 3099.48 | 554.60  | 483.69    | 127.11 |
| # 27 | control   | 60.60 | 22.39 | 17.02 | 69.99 | 3175.45 | 624.31  | 617.31    | 125.98 |
| # 28 | control   | 60.03 | 22.38 | 17.60 | 68.18 | 2785.83 | 657.94  | 265.90    | 137.72 |
| # 29 | control   | 57.41 | 25.13 | 17.46 | 63.57 | 2949.65 | 940.84  | 346.46    | 129.68 |
| # 30 | control   | 56.92 | 26.80 | 16.28 | 54.47 | 2089.47 | 479.88  | 548.51    | 129.64 |
| # 31 | control   | 60.37 | 22.80 | 16.84 | 71.97 | 3982.10 | 604.55  | 274.93    | 167.69 |
| # 1  | carnosine | 60.57 | 21.86 | 17.58 | 61.36 | 2994.37 | 623.42  | 229.49    | 110.45 |
| # 2  | placebo   | 60.14 | 23.19 | 16.68 | 61.06 | 3797.93 | 478.71  | 279.04    | 121.51 |
| # 3  | placebo   | 58.24 | 24.71 | 17.05 | 56.34 | 2993.91 | 642.84  | 219.16    | 104.23 |
| # 4  | carnosine | 59.33 | 22.93 | 17.75 | 54.43 | 2329.60 | 428.36  | 251.47    | 93.08  |
| # 5  | carnosine | 61.39 | 21.95 | 16.67 | 59.41 | 2713.25 | 437.85  | 144.96    | 100.40 |
| # 6  | carnosine | 58.24 | 24.12 | 17.65 | 61.29 | 2588.89 | 605.55  | 237.19    | 101.74 |
| # 7  | carnosine | 55.02 | 25.56 | 19.43 | 64.61 | 3042.48 | 502.02  | 215.80    | 94.33  |

|      |           |       |       |       |       |         |         |        |        |
|------|-----------|-------|-------|-------|-------|---------|---------|--------|--------|
| # 8  | placebo   | 59.96 | 22.77 | 17.28 | 61.25 | 2929.59 | 1010.63 | 255.41 | 99.84  |
| # 9  | carnosine | 59.52 | 24.08 | 16.40 | 54.19 | 2713.84 | 518.06  | 189.67 | 93.21  |
| # 12 | carnosine | 59.99 | 23.42 | 16.59 | 63.20 | 2673.36 | 592.82  | 482.22 | 96.70  |
| # 13 | carnosine | 63.26 | 20.25 | 16.50 | 63.68 | 3472.47 | 478.24  | 288.47 | 106.35 |
| # 14 | carnosine | 59.01 | 23.92 | 17.08 | 49.17 | 2066.12 | 1025.69 | 384.02 | 92.93  |
| # 15 | placebo   | 64.70 | 19.12 | 16.20 | 64.67 | 2904.98 | 507.01  | 457.86 | 105.41 |
| # 16 | carnosine | 60.07 | 22.71 | 17.23 | 50.13 | 2128.02 | 483.25  | 220.07 | 98.25  |
| # 17 | placebo   | 59.85 | 22.06 | 18.10 | 57.21 | 2415.98 | 633.89  | 482.28 | 64.08  |
| # 18 | placebo   | 61.81 | 20.78 | 17.42 | 60.58 | 3161.06 | 620.95  | 298.05 | 86.02  |
| # 19 | placebo   | 56.23 | 26.52 | 17.26 | 57.07 | 2936.25 | 667.72  | 344.13 | 82.18  |
| # 20 | placebo   | 58.84 | 23.21 | 17.96 | 56.47 | 2601.57 | 769.12  | 369.88 | 76.80  |
| # 21 | placebo   | 57.77 | 25.58 | 16.66 | 57.50 | 2586.35 | 696.90  | 347.88 | 108.10 |
| # 22 | placebo   | 62.77 | 20.33 | 16.90 | 59.61 | 2492.29 | 783.28  | 457.80 | 92.99  |
| # 23 | carnosine | 60.86 | 21.94 | 17.20 | 54.93 | 2483.39 | 670.15  | 468.55 | 112.61 |
| # 24 | carnosine | 59.11 | 24.01 | 16.89 | 58.14 | 3640.73 | 930.82  | 350.58 | 91.86  |
| # 25 | placebo   | 59.11 | 24.02 | 16.87 | 61.66 | 3235.92 | 537.68  | 419.90 | 112.22 |
| # 26 | carnosine | 62.72 | 20.39 | 16.90 | 57.52 | 2648.22 | 529.18  | 364.10 | 103.54 |
| # 27 | placebo   | 57.60 | 24.86 | 17.55 | 59.78 | 2722.98 | 583.45  | 450.74 | 102.82 |
| # 28 | carnosine | 60.54 | 21.93 | 17.54 | 58.51 | 2907.36 | 653.56  | 297.82 | 91.28  |
| # 29 | carnosine | 57.81 | 24.99 | 17.21 | 56.15 | 3034.35 | 760.83  | 288.05 | 97.70  |
| # 30 | placebo   | 56.35 | 26.59 | 17.06 | 41.98 | 1642.26 | 518.87  | 333.74 | 83.96  |
| # 31 | placebo   | 62.39 | 21.56 | 16.06 | 76.03 | 4087.37 | 732.17  | 609.76 | 137.61 |

Table S4 – Plasma mean concentrations (n=2) for reduced albumin (HSA-SH), cysteinylated albumin (HSA-Cys), glycated albumin (HSA-Glc), total protein (P-PRO), carboxymethyl lysine (P-CML), advanced glycoxidation end-products (P-AGE), advanced oxidation protein products(P-AOPP) and protein carbonyls (P-PCO).

| <b>Name</b>                                                               | <b>abbreviation</b> | <b>Precursor ion (m/z)</b> |
|---------------------------------------------------------------------------|---------------------|----------------------------|
| <i>histidine</i>                                                          | His                 | 156.07675                  |
| <i>histidine-acrolein (propanal) adduct</i>                               | His-propanal        | 212.10296                  |
| <i>histidine-acrolein (propanol) adduct</i>                               | His-propanol        | 214.11861                  |
| <i>3-hydroxypropyl-mercapturic acid</i>                                   | 3-HPMA              | 220.06380                  |
| <i>carnosine</i>                                                          | CAR                 | 227.11387                  |
| <i>carnosine-acrolein Schiff base adduct</i>                              | CAR-ACR-SB          | 265.12952                  |
| <i>carnosine-acrolein Schiff base adduct<br/>(reduced form)</i>           | CAR-ACR-SB-red      | 267.14517                  |
| <i>carnosine-acrolein Michael adduct<br/>(carnosine-propanal)</i>         | POL                 | 283.14008                  |
| <i>reduced carnosine-acrolein<br/>Michael adduct (carnosine-propanol)</i> | PAL                 | 285.15573                  |
| <i>mercapturic acid-4hydroxynonenal<br/>Schiff base adduct</i>            | MA-HNE-SB           | 302.14205                  |
| <i>histidine-4-hydroxynonenal adduct</i>                                  | His-HNE             | 312.19178                  |
| <i>histidine-dihydroxynonane adduct</i>                                   | His-DHN             | 314.20743                  |
| <i>tyrosyl-histidine</i>                                                  | Tyr-His (IS)        | 319.14008                  |
| <i>mercapturic acid-4hydroxynonenal<br/>Michael adduct</i>                | MA-HNE              | 320.15262                  |
| <i>(3-formyl-3,4-dehydropiperidino) carnosine</i>                         | FDP-CAR             | 321.15573                  |
| <i>mercapturic acid-dihydroxynonane<br/>Michael adduct</i>                | MA-DHN              | 322.16827                  |
| <i>(3-formyl-3,4-dehydropiperidino) carnosine<br/>(reduced)</i>           | FDP-CAR -red        | 323.17138                  |
| <i>carnosine-4hydroxynonenal<br/>Schiff base adduct</i>                   | CAR-HNE-SB-red      | 367.23398                  |
| <i>carnosine-4hydroxynonenal<br/>Michael adduct</i>                       | CAR-HNE-MA          | 383.22890                  |

*carosine-dihydroxynonane adduct*

|         |           |
|---------|-----------|
| CAR-DHN | 385.24455 |
|---------|-----------|

Table S5- List of precursor ions of the main carnosine adducts and metabolites

| <i>compound</i>                 | <b>Precursor ion</b> | <b>Fragment ions</b> | <b>Collision energy</b> |
|---------------------------------|----------------------|----------------------|-------------------------|
|                                 | (m/z)                |                      | (%)                     |
| <i>Internal standard (TH)</i>   | 319.1                | 110.1, 156.1         | 20                      |
| <i>Carnosine (CAR)</i>          | 227.1                | 110.1, 122.1         | 30                      |
| <i>Carnosine propanal (PAL)</i> | 283.1                | 110.1, 151.2         | 35                      |
| <i>Carnosine propanol (POL)</i> | 285.2                | 110.1, 168.2         | 35                      |

Table S6- MRM transitions of carnosine, carnosine adducts and internal standard used for quantitation
